# Supplementary material
Source: HighWire-hosted journal article supplement (https://www.annfammed.org/highwire/filestream/7629/field_highwire_adjunct_files/0/afm0509p227.pdf)
Supplement: afm0509p227.pdf [file afm0509p227.pdf]

**Table 2. Taxonomy of Patient Error, revised**

| Level 1              | Level 2                    | Level 3                                     | Examples <sup>a</sup>                                                         |                                                                                                                   |                                                                                                  |
|----------------------|----------------------------|---------------------------------------------|-------------------------------------------------------------------------------|-------------------------------------------------------------------------------------------------------------------|--------------------------------------------------------------------------------------------------|
|                      |                            |                                             | Type of Error                                                                 | Participant Comment                                                                                               |                                                                                                  |
| Action errors        |                            |                                             |                                                                               |                                                                                                                   |                                                                                                  |
| 1. Attendance errors | 1.1 Underattendance        | 1.1.1 Nonattendance                         | Refusal of visits                                                             | "If it runs through the family we seek no help" (group 2)                                                         |                                                                                                  |
|                      |                            | 1.1.2 Insufficient attendance               | Less frequent attendance than recommended                                     | "(Not) following your gut instinct and not seeking a second opinion" (group 8)                                    |                                                                                                  |
|                      | 1.2 Untimely attendance    | 1.2.1 Early attendance                      | Attendance for self-limiting conditions                                       | "Hypochondriacal behavior" (group 5)                                                                              |                                                                                                  |
|                      |                            | 1.2.2 Late attendance                       | Deferral of visit                                                             | "Delay in visiting the doctor when you know you're sick" (group 2)                                                |                                                                                                  |
|                      | 1.3 Overattendance         | 1.3.1 Frequent attendance                   | More frequent attendance than required                                        | "Overattendance (eg, because the doctor is cute)" (group 2)                                                       |                                                                                                  |
|                      | 1.4 Misattendance          | 1.4.1 Inappropriate type of visit           | Demand for a home visit by a patient who could have safely come to the clinic | Irregularity (group 2)                                                                                            |                                                                                                  |
|                      |                            | 1.4.2 No usual provider chosen              | Frequently changing providers                                                 | "Consulting multiple doctors" (group 9)                                                                           |                                                                                                  |
|                      |                            | 1.4.3 Use of unqualified sources            | Use of unqualified complementary sources                                      | Taking advice from marginal sources: "over the fence, nonqualified practitioners, TV adverts" (group 9)           |                                                                                                  |
|                      |                            | 1.4.4. Refusals during visits               | Refusal to be examined by a student doctor                                    | "Refusing to be checked by the doctor" (group 1)                                                                  |                                                                                                  |
|                      |                            | 1.4.5 No escort when needed                 | No interpreter                                                                | "Not coming in with an interpreter (friend/relative) when their communication in English is suboptimal" (group 9) |                                                                                                  |
|                      |                            | 1.4.6 Inappropriate escort/chaperone        | Child                                                                         | "Not telling doctor what their real concerns are" (group 9)                                                       |                                                                                                  |
|                      | 2. Assertion errors        | 2.1 Taciturnity                             | 2.1.1 Nondisclosure of relevant information                                   | Not updating contact information                                                                                  | "Not telling the doctor all your symptoms" (group 7)                                             |
|                      |                            |                                             | 2.1.2 Nonquestioning                                                          | Not asking for clarification of confusing information                                                             | "Not questioning professionals if instructions are unclear or they do not understand" (group 10) |
| 2.2 Verbosity        |                            | 2.2.1 Excessive talk                        | Not giving the clinician sufficient time to meet concerns                     | "Telling doctor what I want but not giving much time for him to tell me what he would like" (group 3)             |                                                                                                  |
| 2.3 Extraneous talk  |                            | 2.3.1 Irrelevant talk                       | Trying too hard to recall details                                             | "No relationship with doctor, so just say 'yes' to everything" (group 1)                                          |                                                                                                  |
| 2.4 Erroneous talk   |                            | 2.4.1 Inaccurate talk                       | Contradicting medical advice to family or friends                             | "Inaccurate/false responses" (group 2)                                                                            |                                                                                                  |
| 2.5 Inarticulateness |                            | 2.5.1 Inability to express thoughts clearly | Limited language skills; translation errors.                                  | Inability to describe your sickness" (group 7)                                                                    |                                                                                                  |
| 2.6 Disrespect       |                            | 2.6.1 Lack of caring                        | Lack of regard for interests of clinician                                     | "Making 1 appointment for 2 to 4 people" (group 10)                                                               |                                                                                                  |
|                      |                            | 2.6.2 Discourtesy                           | Cell phone on during visits                                                   | "Not notifying if late or, need to miss, appointments" (group 10)                                                 |                                                                                                  |
| 2.7 Artfulness       |                            | 2.6.3 Abusiveness                           | Violent patient                                                               | "Being drunk and abusive" (group 6)                                                                               |                                                                                                  |
|                      |                            | 2.7.1 Dishonesty                            | Distortion of information given                                               | "Lying about symptoms to jump queue" (group 4)                                                                    |                                                                                                  |
|                      | 2.7.2 Pretense of sickness | Benefits of sick role                       | "Pretending to be ill to take the day off school" (group 7)                   |                                                                                                                   |                                                                                                  |
| 3. Adherence errors  | 3.1 Collection errors      | 2.7.3 Manipulation of system                | False claims for compensation                                                 | "Seeks to manipulate the outflow of information from the medical record" (group 9)                                |                                                                                                  |
|                      |                            | 3.1.1 Prescriptions not redeemed            | Prescribed medications not collected from pharmacies                          | "Only getting medications they can afford for now" (group 10)                                                     |                                                                                                  |
|                      | 3.2 Storage errors         | 3.2.1 Storage errors                        | Storage of medications past expiration date                                   | "Accumulating discontinued medications" (group 9)                                                                 |                                                                                                  |
|                      |                            | 3.3 Self-administration                     | 3.3.1 No treatment                                                            | Failure to take recommended treatment                                                                             | "Running out of medications" (group 10)                                                          |
|                      | 3.3.2 Wrong treatment      |                                             | Taking discontinued treatment                                                 | "Using old medication" (group 6)                                                                                  |                                                                                                  |
|                      | 3.3.3 Dosage errors        |                                             | Excessive dosage                                                              | "Doubling up treatment if going away" (group 3)                                                                   |                                                                                                  |

Table 2 continues

<sup>a</sup> Groups are numbered according to Table 1.

**Table 2. Taxonomy of Patient Error, revised** (continued)

|                                        |                              |                                  | Examples <sup>a</sup>                                        |                                                                                         |
|----------------------------------------|------------------------------|----------------------------------|--------------------------------------------------------------|-----------------------------------------------------------------------------------------|
| Level 1                                | Level 2                      | Level 3                          | Type of Error                                                | Participant Comment                                                                     |
| Action errors (continued)              |                              |                                  |                                                              |                                                                                         |
|                                        |                              | 3.3.4 Timing errors              | Taking medication at incorrect times                         | "Taking medication in wrong order" (group 11)                                           |
|                                        |                              | 3.3.5 Duration errors            | Treatment duration is shorter than recommended               | "Stopping too soon" (group 11)                                                          |
|                                        |                              | 3.3.6 Hazardous interactions     | Interactions of over-the-counter and prescribed treatments   | "Mixing pills and alcohol" (group 6)                                                    |
|                                        | 3.4 Other delivery errors    | 3.4.1 Sharing of medication      | Sharing medication with family or friends                    | "Sharing resources with relatives, eg, 'rescue' asthma inhalers" (group 10)             |
| Mental errors: proximate determinants  |                              |                                  |                                                              |                                                                                         |
| 4. Memory errors                       | 4.1 Memory lapses            | 4.1.1 Forgetfulness              | Forgetting to take medication                                | "Forgetting to collect the medication" (group 11)                                       |
|                                        |                              | 4.1.2 Misrecalling information   | Misrecalling when to attend for care                         | "Turn up at wrong time" (group 1)                                                       |
| 5. Mindfulness errors                  | 5.1 Inattention              | 5.1.1 Failure to notice          | Not perceiving                                               | "Not listening to what the doctor says" (group 8)                                       |
|                                        |                              | 5.1.2 Recognize incorrectly      | Misreading of symptoms                                       | "Over-reacting to children's symptoms" (group 4)                                        |
|                                        | 5.2 Overattentiveness        | 5.2.1 Hypervigilance             | Overattentiveness to variations in normal function           | "Hyperchondriacal behavior" (group 5)                                                   |
| 6. Misjudgments                        | 6.1 Assessment errors        | 6.1.1 Failure to check           | Failure to check on laboratory results                       | "Not checking pills from chemist" (group 3)                                             |
|                                        |                              | 6.1.2 Failure to monitor         | Failure to monitor weight                                    | "Not monitoring blood glucose as recommended" (group 10)                                |
|                                        |                              | 6.1.3 Failure to record          | Failure to keep a patient diary when requested               | "Not recording symptoms when asked, or bringing record back as asked" (group 9)         |
|                                        |                              | 6.1.4 Wrong assessment           | Misreading of instructions                                   | "Stopping medication just because you feel better" (group 1)                            |
|                                        | 6.2 Unrealistic expectations | 6.2.1 Overexpectation of others  | Immediate cure                                               | "Expecting the doctor to read their mind" (group 9)                                     |
|                                        |                              | 6.2.2 Overexpectation of self    | Self-diagnosis                                               | "Using the Internet for self-diagnosis and self-treatment" (group 10)                   |
|                                        |                              | 6.2.3 Underexpectation of others | Expected inability of clinician to help                      | "Having no faith in doctors" (group 8)                                                  |
|                                        |                              | 6.2.4 Underexpectation of self   | Expected inability of self to cope or share responsibilities | "Inability to cope with new presentations" (group 11)                                   |
| Mental errors: background determinants |                              |                                  |                                                              |                                                                                         |
| 7. Knowledge deficits                  | 7.1 Knowledge errors         | 7.1.1 Low literacy               | Poor language skills                                         | "Inability to read and understand instructions" (group 1)                               |
|                                        |                              | 7.1.2 Low health literacy        | Not knowing the name of medications                          | "Confusion over brand, shape, color and name (especially when these change" (group 11)  |
|                                        |                              | 7.1.3 Low numeracy               | Inability to budget                                          | "Not budgeting and not having an emergency fund for medical care" (group 8)             |
|                                        | 7.2 Comprehension errors     | 7.2.1 Lack of understanding      | Failure to understand instructions                           | "Not understanding instructions (eg, re: casts, equipment)" (group 10)                  |
|                                        | 7.3 Logic errors             | 7.3.1 Reasoning errors           | Considering that a medication imparts absolute protection    | "Assuming that must be OK because feeling good" (group 2)                               |
| 8. Attitudes not conducive to health   | 8.1 Selfishness              | 8.3.1 Excessive pride            | Reluctance to ask for, or accept help                        | "Reluctance to ask for help (eg, credit) because of pride" (group 8)                    |
|                                        |                              | 8.3.2 Dishonesty                 | Lying                                                        | "Lying about symptoms to jump queue" (group 4)                                          |
|                                        |                              | 8.3.3 Self-pity                  | Feeling a victim                                             | "Feeling self-pity; becoming a victim" (group 1)                                        |
|                                        |                              | 8.3.4 Hedonism                   | Willingness to drink alcohol inappropriately                 | "Taking medicines for recreational use (eg, too much insulin to get a high)" (group 11) |

Table 2 continues

<sup>a</sup> Groups are numbered according to Table 1.

**Table 2. Taxonomy of Patient Error, revised** *(continued)*

|                                                    |                      |                                        | Examples <sup>a</sup>                                           |                                                                                        |
|----------------------------------------------------|----------------------|----------------------------------------|-----------------------------------------------------------------|----------------------------------------------------------------------------------------|
| Level 1                                            | Level 2              | Level 3                                | Type of Error                                                   | Participant Comment                                                                    |
| Mental errors: background determinants (continued) |                      |                                        |                                                                 |                                                                                        |
|                                                    | 8.2 Self-neglect     | 8.2.1 Excessive selflessness           | Carriage of other people's burdens                              | "Putting other people's needs first" (group 2)                                         |
|                                                    |                      | 8.2.2 Lack of self-regard              | Shyness at visits                                               | "Forget to love oneself; putting other people before yourself" (group 4)               |
|                                                    |                      | 8.2.3 Carelessness                     | Carelessness                                                    | "Losing instructions" (group 2)                                                        |
|                                                    |                      | 8.2.4 Embarrassment                    | Shame                                                           | "Not taking medications because you think your friends might mock you" (group 7)       |
|                                                    | 8.3 Carelessness     | 8.4.1 Inattention                      | Distractedness or absent-mindedness                             | "Patient distracted—not engaging in the consultation" (group 10)                       |
|                                                    |                      | 8.4.2 Thoughtlessness regarding others | Sharing food and drink while infectious                         | "Not staying home when feeling sick (so spreading influenza)" (group 8)                |
|                                                    |                      | 8.4.3 Excessive risk taking            | "She'll be OK" attitude                                         | "Taking risks with your health when sick" (group 5)                                    |
|                                                    |                      | 8.4.4 Apathy                           | Laziness in getting medication                                  | "Noncollection of medicines because of sloth" (group 11)                               |
|                                                    |                      | 8.4.5 Unreliability                    | Inconsistency in passing on messages                            | "Inconsistent with medication" (group 3)                                               |
|                                                    | 8.5 Distrust         | 8.5.1 Disbelief                        | Suspicion of health professionals                               | "Not believing the doctor" (group 2)                                                   |
|                                                    |                      | 8.5.2 Fearfulness                      | Fear of needles                                                 | "Staying with an unhelpful doctor because of familiarity and fear of change" (group 1) |
|                                                    |                      | 8.5.3 Uncooperativeness                | Unwillingness to negotiate                                      | "Refusing to be checked by the doctor" (group 1)                                       |
|                                                    |                      | 8.5.4 Pessimism                        | Feeling of helplessness                                         | "Giving up hope" (group 1)                                                             |
|                                                    | 8.6 Anger            | 8.6.1 Impatience                       | Impatience while waiting for care                               | "Not having patience while waiting" (group 6)                                          |
|                                                    |                      | 8.6.2 Intolerance                      | Prejudice against doctors with non-English speaking backgrounds | "Stressing out on things that you have forgotten to do" (group 4)                      |
|                                                    | 8.7 Other priorities | 8.7.1 Cultural priorities              | Mourning takes priority over medication adherence               | "Tangi [funeral] disrupts medical/health needs" (group 3)                              |

<sup>a</sup> Groups are numbered according to Table 1.
